# Supplementary material for: Statistical modeling for sensitive detection of low-frequency single nucleotide variants
Source: PubMed Central journal article supplement (PMC5001245; doi:10.1186/s12864-016-2905-x), 2016-08-22
Supplement: 12864_2016_2905_MOESM1_ESM.pdf [file 12864_2016_2905_MOESM1_ESM.pdf]

**Additional file 1 - Summary of major somatic callers, their methods of detecting SNV candidates and the limitations**

| <b>Mutation Callers</b> | <b>Candidate Identification Method</b>                                                                       | <b>Limitation</b>                                                                                                                                        |
|-------------------------|--------------------------------------------------------------------------------------------------------------|----------------------------------------------------------------------------------------------------------------------------------------------------------|
| VarScan2                | Fisher's exact test.                                                                                         | Single point estimation of sequencing error for each locus.                                                                                              |
| Strelka                 | Bayesian approach that jointly consider normal SNV genotype and continuous tumor SNV allele frequencies.     | At each locus, assuming equal error rate for the 3 possible alternatives.                                                                                |
| MuTect                  | Candidate SNV detection using log odds score to differentiate sequence error from true variants.             | Assuming all substitution errors are equally likely.                                                                                                     |
| UDT-Seq                 | Tabulate the error rates based on multiple context features, then apply binomial model to detect candidates. | Tabulation based method has limited ability to incorporate larger number of features. Distributions other than binomial can better deal with count data. |
