# Supplementary material for: Statistical modeling for sensitive detection of low-frequency single nucleotide variants
Source: PubMed Central journal article supplement (PMC5001245; doi:10.1186/s12864-016-2905-x), 2016-08-22
Supplement: 12864_2016_2905_MOESM2_ESM.pdf [file 12864_2016_2905_MOESM2_ESM.pdf]

## Additional file 2 - Ion Proton testing benchmark design

Individual NA12878 was used as the 'normal' sample.

---

| ID             | Mixing Percent |
|----------------|----------------|
| NA18507        | 1%             |
| NA18853        | 1%             |
| NA18526        | 1%             |
| NA19239        | 1%             |
| NA19238        | 1%             |
| NA19092        | 1%             |
| NA18870        | 2%             |
| NA18502        | 2%             |
| NA18871        | 2%             |
| NA18501        | 2%             |
| NA18987        | 3%             |
| NA12872        | 3%             |
| NA18622        | 3%             |
| NA12751        | 6%             |
| NA07000        | 6%             |
| NA18965        | 8%             |
| NA12750        | 10%            |
| <b>NA12878</b> | <b>46%</b>     |

---
