# Supplementary material for: Statistical modeling for sensitive detection of low-frequency single nucleotide variants
Source: PubMed Central journal article supplement (PMC5001245; doi:10.1186/s12864-016-2905-x), 2016-08-22
Supplement: 12864_2016_2905_MOESM3_ESM.pdf [file 12864_2016_2905_MOESM3_ESM.pdf]

**Additional file 3 - Illumina MiSeq benchmark design**

| <b>ID</b> | <b>CAL_A</b> | <b>CAL_B</b> | <b>CAL_C</b> | <b>CAL_D</b> |
|-----------|--------------|--------------|--------------|--------------|
| NA12156   | 1%           | 5%           | 20%          | 74%          |
| NA12878   | 5%           | 20%          | 74%          | 1%           |
| NA18507   | 20%          | 74%          | 1%           | 5%           |
| NA19240   | 74%          | 1%           | 5%           | 20%          |
