# Supplementary material for: Statistical modeling for sensitive detection of low-frequency single nucleotide variants
Source: PubMed Central journal article supplement (PMC5001245; doi:10.1186/s12864-016-2905-x), 2016-08-22
Supplement: 12864_2016_2905_MOESM4_ESM.pdf [file 12864_2016_2905_MOESM4_ESM.pdf]

**Additional file 4 - Genomic sequence context features used in GLM**

| Features                                 | Definition                                                                                                                                                                                                          | Covariates    |
|------------------------------------------|---------------------------------------------------------------------------------------------------------------------------------------------------------------------------------------------------------------------|---------------|
| NA                                       | Intercept only model, containing the baseline for each feature. Specifically: substitution is A → C, upstream and downstream bases are both A; GC, hmer_dist, hmer_len, hden, hrun_op and alt_up_down_eq are all 0. | Intercept     |
| substitution                             | Change from reference base to alternative base; there are 12 possible values. A → G means reference base A to alternative base G.                                                                                   | A → G         |
|                                          |                                                                                                                                                                                                                     | A → T         |
|                                          |                                                                                                                                                                                                                     | C → A         |
|                                          |                                                                                                                                                                                                                     | C → G         |
|                                          |                                                                                                                                                                                                                     | C → T         |
|                                          |                                                                                                                                                                                                                     | G → A         |
|                                          |                                                                                                                                                                                                                     | G → C         |
|                                          |                                                                                                                                                                                                                     | G → T         |
|                                          |                                                                                                                                                                                                                     | T → A         |
|                                          |                                                                                                                                                                                                                     | T → C         |
|                                          |                                                                                                                                                                                                                     | T → G         |
|                                          |                                                                                                                                                                                                                     | upstream base |
| G                                        |                                                                                                                                                                                                                     |               |
| T                                        |                                                                                                                                                                                                                     |               |
| downstream base                          | Immediate downstream base (4 possible values: A,C,G,T).                                                                                                                                                             | C             |
|                                          |                                                                                                                                                                                                                     | G             |
|                                          |                                                                                                                                                                                                                     | T             |
| GC content                               | Percent of GC bases within a 101 base window that extends 50 nucleotides both upstream and downstream.                                                                                                              | GC            |
| distance to the closest homopolymer base | Number of nucleotides to the closest base of the homopolymer within a window that extends 15 bases both upstream and downstream (possible values 0 to 13, 15 for no homopolymer within the window).                 | hmer_dist     |
| length of the closest homopolymer        | Length of the closest homopolymer within a window that extends 15 bases both upstream and downstream (possible values 0, 3, 4 to 31).                                                                               | hmer_len      |
| homopolymer bases percentage             | Fraction of bases within a 31 bases window that are in homopolymers (possible values 0, 3/31, 4/31 to 1). The window extends 15 bases both upstream and downstream.                                                 | hmer_percent  |
| overlap with homopolymer                 | Whether the locus of interest is within a homopolymer, 1 means yes, 0 means no.                                                                                                                                     | hmer_op       |
| upstream or downstream base shift        | Whether the alternative base is the same as the immediate upstream or downstream base, 1 means yes, 0 means no.                                                                                                     | alt_up_down   |
