# Supplementary material for: Statistical modeling for sensitive detection of low-frequency single nucleotide variants
Source: PubMed Central journal article supplement (PMC5001245; doi:10.1186/s12864-016-2905-x), 2016-08-22
Supplement: 12864_2016_2905_MOESM5_ESM.pdf [file 12864_2016_2905_MOESM5_ESM.pdf]

**Additional file 5 - Vuong's non-nested test on 4 distributions applied to Illumina MiSeq training data**

| <b>Model 1</b> | <b>Model 2</b> | <b>Vuong z-statistic<br/>BIC-corrected</b> | <b>Hypothesis</b> | <b>P value</b> |
|----------------|----------------|--------------------------------------------|-------------------|----------------|
| Poisson        | NB             | -23.38                                     | model2 > model1   | < 2.22e-16     |
| Poisson        | ZIP            | -21.30                                     | model2 > model1   | < 2.22e-16     |
| NB             | ZIP            | -0.47                                      | model2 < model1   | 0.31796        |
| ZIP            | ZINB           | -20.22                                     | model2 > model1   | < 2.22e-16     |
| NB             | ZINB           | -17.44                                     | model2 > model1   | < 2.22e-16     |
