# Supplementary material for: Statistical modeling for sensitive detection of low-frequency single nucleotide variants
Source: PubMed Central journal article supplement (PMC5001245; doi:10.1186/s12864-016-2905-x), 2016-08-22
Supplement: 12864_2016_2905_MOESM6_ESM.pdf [file 12864_2016_2905_MOESM6_ESM.pdf]

**Additional file 6 - Negative binomial GLM coefficients for Ion Proton and Illumina MiSeq training datasets**

| Parameter   | Ion Proton |                |         | Illumina MiSeq |                |          |
|-------------|------------|----------------|---------|----------------|----------------|----------|
|             | Estimate   | Standard Error | P value | Estimate       | Standard Error | P value  |
| (Intercept) | -10.9331   | 0.0105         | < 2e-16 | -1.0700        | 0.0290         | < 2e-16  |
| A → C       | -0.1516    | 0.0072         | < 2e-16 | 0.6922         | 0.0220         | < 2e-16  |
| A → G       | 1.5093     | 0.0060         | < 2e-16 | 2.6550         | 0.0190         | < 2e-16  |
| A → T       | -0.0352    | 0.0072         | < 2e-16 | -0.2219        | 0.0270         | 4.26e-16 |
| C → A       | -0.1073    | 0.0075         | < 2e-16 | -0.3068        | 0.0290         | < 2e-16  |
| C → G       | -0.3362    | 0.0080         | < 2e-16 | -0.9909        | 0.0360         | < 2e-16  |
| C → T       | 1.3287     | 0.0062         | < 2e-16 | 1.8840         | 0.0200         | < 2e-16  |
| G → A       | 1.2600     | 0.0062         | < 2e-16 | 1.7870         | 0.0200         | < 2e-16  |
| G → C       | -0.2030    | 0.0077         | < 2e-16 | -0.7178        | 0.0330         | < 2e-16  |
| G → T       | -0.1705    | 0.0075         | < 2e-16 | -0.7540        | 0.0360         | < 2e-16  |
| T → A       | 0.0445     | 0.0071         | < 2e-16 | -0.2594        | 0.0270         | < 2e-16  |
| T → C       | 1.5362     | 0.0059         | < 2e-16 | 2.7120         | 0.0190         | < 2e-16  |
| up base A   | 0.1046     | 0.0037         | < 2e-16 | 0.1640         | 0.0100         | < 2e-16  |
| up base C   | 0.2316     | 0.0038         | < 2e-16 | 0.4087         | 0.0100         | < 2e-16  |
| up base G   | 0.3288     | 0.0037         | < 2e-16 | 0.5110         | 0.0100         | < 2e-16  |
| down base A | -0.0908    | 0.0037         | < 2e-16 | -0.2120        | 0.0100         | < 2e-16  |
| down base C | 0.3356     | 0.0036         | < 2e-16 | 0.3462         | 0.0090         | < 2e-16  |
| down base G | 0.1748     | 0.0037         | < 2e-16 | 0.2600         | 0.0090         | < 2e-16  |
| GC          | 0.0058     | 0.0001         | < 2e-16 | 0.0099         | 0.0003         | < 2e-16  |
| hmer_den    | 0.2994     | 0.0136         | < 2e-16 | -0.0798        | 0.0360         | 0.028    |
| hmer_op     | 0.3313     | 0.0037         | < 2e-16 | -0.1430        | 0.0100         | < 2e-16  |
| hmer_dist   | -0.0137    | 0.0004         | < 2e-16 | -0.0009        | 0.0010         | 0.4      |
| hmer_len    | 0.0790     | 0.0012         | < 2e-16 | 0.0018         | 0.0030         | 0.569    |
| alt_up_down | 0.7385     | 0.0026         | < 2e-16 | 0.0760         | 0.0070         | < 2e-16  |
