# Supplementary material for: Statistical modeling for sensitive detection of low-frequency single nucleotide variants
Source: PubMed Central journal article supplement (PMC5001245; doi:10.1186/s12864-016-2905-x), 2016-08-22
Supplement: 12864_2016_2905_MOESM7_ESM.pdf [file 12864_2016_2905_MOESM7_ESM.pdf]

**Additional file 7 - Zero-inflated Poisson GLM coefficients for Ion Proton training datasets**

| Parameter   | Ion Proton ZIP Zero |                |         | Ion Proton ZIP Count |                |         |
|-------------|---------------------|----------------|---------|----------------------|----------------|---------|
|             | Estimate            | Standard Error | P value | Estimate             | Standard Error | P value |
| (Intercept) | 1.9146              | 0.0171         | <.0001  | -8.8454              | 0.0116         | <.0001  |
| A → C       | 0.1445              | 0.0107         | <.0001  | -0.0243              | 0.0090         | 0.0073  |
| A → G       | -2.0633             | 0.0093         | <.0001  | 0.1400               | 0.0068         | <.0001  |
| A → T       | 0.1197              | 0.0106         | <.0001  | 0.0946               | 0.0089         | <.0001  |
| C → A       | 0.2546              | 0.0110         | <.0001  | 0.1415               | 0.0092         | <.0001  |
| C → G       | 0.4922              | 0.0116         | <.0001  | 0.1091               | 0.0098         | <.0001  |
| C → T       | -2.1312             | 0.0111         | <.0001  | -0.1127              | 0.0074         | <.0001  |
| G → A       | -2.0341             | 0.0109         | <.0001  | -0.1449              | 0.0075         | <.0001  |
| G → C       | 0.4040              | 0.0112         | <.0001  | 0.1570               | 0.0094         | <.0001  |
| G → T       | 0.1876              | 0.0111         | <.0001  | 0.0191               | 0.0095         | 0.0440  |
| T → A       | 0.1497              | 0.0103         | <.0001  | 0.1971               | 0.0087         | <.0001  |
| T → C       | -2.0191             | 0.0092         | <.0001  | 0.1767               | 0.0068         | <.0001  |
| up base A   | -0.0721             | 0.0063         | <.0001  | 0.0706               | 0.0040         | <.0001  |
| up base C   | -0.2825             | 0.0064         | <.0001  | 0.0834               | 0.0040         | <.0001  |
| up base G   | -0.3168             | 0.0061         | <.0001  | 0.1817               | 0.0039         | <.0001  |
| down base A | 0.1466              | 0.0066         | <.0001  | -0.0295              | 0.0042         | <.0001  |
| down base C | -0.1925             | 0.0060         | <.0001  | 0.2428               | 0.0037         | <.0001  |
| down base G | -0.1177             | 0.0062         | <.0001  | 0.1291               | 0.0039         | <.0001  |
| GC          | 0.0014              | 0.0002         | <.0001  | 0.0061               | 0.0001         | <.0001  |
| hmer_den    | 0.3180              | 0.0221         | <.0001  | 0.3798               | 0.0133         | <.0001  |
| hmer_op     | 0.0696              | 0.0060         | <.0001  | 0.3578               | 0.0036         | <.0001  |
| hmer_dist   | 0.0320              | 0.0007         | <.0001  | 0.0099               | 0.0004         | <.0001  |
| hmer_len    | 0.0332              | 0.0019         | <.0001  | 0.0918               | 0.0012         | <.0001  |
| alt_up_down | -0.4933             | 0.0044         | <.0001  | 0.3525               | 0.0027         | <.0001  |
