# Supplementary material for: Statistical modeling for sensitive detection of low-frequency single nucleotide variants
Source: PubMed Central journal article supplement (PMC5001245; doi:10.1186/s12864-016-2905-x), 2016-08-22
Supplement: 12864_2016_2905_MOESM8_ESM.pdf [file 12864_2016_2905_MOESM8_ESM.pdf]

**Additional file 8 - Zero-inflated Negative Binomial GLM coefficients for Ion Proton training datasets**

| Parameter   | Ion Proton ZINB Zero |                |         | Ion Proton ZINB Count |                |         |
|-------------|----------------------|----------------|---------|-----------------------|----------------|---------|
|             | Estimate             | Standard Error | P value | Estimate              | Standard Error | P value |
| (Intercept) | 1.1257               | 0.0242         | <.0001  | -9.5531               | 0.0137         | <.0001  |
| A → C       | 0.1630               | 0.0157         | <.0001  | -0.0452               | 0.0133         | 0.0007  |
| A → G       | -15.1084             | 7.8315         | 0.0537  | 0.2005                | 0.0096         | <.0001  |
| A → T       | 0.2468               | 0.0152         | <.0001  | 0.1734                | 0.0131         | <.0001  |
| C → A       | 0.4575               | 0.0155         | <.0001  | 0.2629                | 0.0137         | <.0001  |
| C → G       | 0.5520               | 0.0164         | <.0001  | 0.1351                | 0.0149         | <.0001  |
| C → T       | -15.2409             | 9.4679         | 0.1075  | 0.0056                | 0.0098         | 0.5662  |
| G → A       | -14.9469             | 8.7844         | 0.0888  | -0.0712               | 0.0098         | <.0001  |
| G → C       | 0.4937               | 0.0158         | <.0001  | 0.2405                | 0.0144         | <.0001  |
| G → T       | 0.3495               | 0.0158         | <.0001  | 0.1213                | 0.0138         | <.0001  |
| T → A       | 0.3202               | 0.0147         | <.0001  | 0.3211                | 0.0129         | <.0001  |
| T → C       | -15.0527             | 7.8142         | 0.0541  | 0.2217                | 0.0096         | <.0001  |
| up base A   | -0.0263              | 0.0084         | 0.0017  | 0.1111                | 0.0039         | <.0001  |
| up base C   | -0.0485              | 0.0088         | <.0001  | 0.2576                | 0.0040         | <.0001  |
| up base G   | 0.1272               | 0.0085         | <.0001  | 0.4031                | 0.0039         | <.0001  |
| down base A | 0.0244               | 0.0086         | 0.0044  | -0.1161               | 0.0040         | <.0001  |
| down base C | 0.1622               | 0.0083         | <.0001  | 0.3995                | 0.0038         | <.0001  |
| down base G | 0.0915               | 0.0085         | <.0001  | 0.2305                | 0.0040         | <.0001  |
| GC          | 0.0005               | 0.0003         | 0.1233  | 0.0057                | 0.0001         | <.0001  |
| hmer_den    | -0.1738              | 0.0303         | <.0001  | 0.1658                | 0.0144         | <.0001  |
| hmer_op     | -0.1482              | 0.0082         | <.0001  | 0.2612                | 0.0039         | <.0001  |
| hmer_dist   | 0.0569               | 0.0010         | <.0001  | 0.0037                | 0.0004         | <.0001  |
| hmer_len    | -0.0223              | 0.0028         | <.0001  | 0.0685                | 0.0013         | <.0001  |
| alt_up_down | -0.7678              | 0.0060         | <.0001  | 0.4657                | 0.0028         | <.0001  |
