# Supplementary material for: Statistical modeling for sensitive detection of low-frequency single nucleotide variants
Source: PubMed Central journal article supplement (PMC5001245; doi:10.1186/s12864-016-2905-x), 2016-08-22
Supplement: 12864_2016_2905_MOESM9_ESM.pdf [file 12864_2016_2905_MOESM9_ESM.pdf]

**Additional file 9 - Zero-inflated Poisson GLM coefficients for Illumina MiSeq training datasets**

| Parameter   | Illumina MiSeq ZIP Zero |                |          | Illumina MiSeq ZIP Count |                |          |
|-------------|-------------------------|----------------|----------|--------------------------|----------------|----------|
|             | Estimate                | Standard Error | P value  | Estimate                 | Standard Error | P value  |
| (Intercept) | -4.7601                 | 0.0792         | < 2e-16  | -8.2124                  | 0.0357         | < 2e-16  |
| A → C       | -0.5475                 | 0.0368         | < 2e-16  | 0.2277                   | 0.0303         | 5.76e-14 |
| A → G       | -4.0851                 | 0.0425         | < 2e-16  | 0.4489                   | 0.0260         | < 2e-16  |
| A → T       | -2.0125                 | 0.1177         | < 2e-16  | -1.6997                  | 0.0736         | < 2e-16  |
| C → A       | -0.3830                 | 0.0563         | 1.02e-11 | -0.5424                  | 0.0511         | < 2e-16  |
| C → G       | 0.2114                  | 0.0728         | 0.00367  | -0.7162                  | 0.0694         | < 2e-16  |
| C → T       | -4.0547                 | 0.0727         | < 2e-16  | -0.3198                  | 0.0289         | < 2e-16  |
| G → A       | -4.1014                 | 0.0821         | < 2e-16  | -0.4230                  | 0.0295         | < 2e-16  |
| G → C       | -0.3811                 | 0.0759         | 5.12e-07 | -0.9758                  | 0.0690         | < 2e-16  |
| G → T       | -0.2028                 | 0.0731         | 0.00552  | -0.8586                  | 0.0673         | < 2e-16  |
| T → A       | -2.2197                 | 0.1292         | < 2e-16  | -1.8542                  | 0.0745         | < 2e-16  |
| T → C       | -4.0724                 | 0.0414         | < 2e-16  | 0.5122                   | 0.0259         | < 2e-16  |
| up base A   | 0.1812                  | 0.0342         | 1.20e-07 | 0.2259                   | 0.0114         | < 2e-16  |
| up base C   | 0.0145                  | 0.0330         | 0.6600   | 0.4132                   | 0.0110         | < 2e-16  |
| up base G   | 0.0292                  | 0.0333         | 0.3802   | 0.5447                   | 0.0110         | < 2e-16  |
| down base A | -0.0294                 | 0.0332         | 0.3753   | -0.2253                  | 0.0113         | < 2e-16  |
| down base C | -0.0892                 | 0.0282         | 0.00158  | 0.3286                   | 0.0094         | < 2e-16  |
| down base G | -0.1613                 | 0.0284         | 1.37e-08 | 0.2072                   | 0.0094         | < 2e-16  |
| GC          | -0.0046                 | 0.0009         | 1.35e-06 | 0.0076                   | 0.0003         | < 2e-16  |
| hmer_den    | -0.1074                 | 0.1109         | 0.3329   | -0.1332                  | 0.0367         | 0.000288 |
| hmer_op     | 0.1045                  | 0.0324         | 0.00125  | -0.0982                  | 0.0110         | < 2e-16  |
| hmer_dist   | -0.0020                 | 0.0032         | 0.5241   | -0.0008                  | 0.0010         | 0.4201   |
| hmer_len    | 0.0054                  | 0.0098         | 0.5840   | 0.0027                   | 0.0032         | 0.3979   |
| alt_up_down | -0.1274                 | 0.0202         | 2.99e-10 | 0.0404                   | 0.0068         | 2.62e-09 |
