# Supplementary material for: Statistical modeling for sensitive detection of low-frequency single nucleotide variants
Source: PubMed Central journal article supplement (PMC5001245; doi:10.1186/s12864-016-2905-x), 2016-08-22
Supplement: 12864_2016_2905_MOESM10_ESM.pdf [file 12864_2016_2905_MOESM10_ESM.pdf]

**Additional file 10 - Zero-inflated Negative Binomial GLM coefficients for Illumina MiSeq training datasets**

| Parameter   | Illumina MiSeq ZINB Zero |                |         | Illumina MiSeq ZINB Count |                |         |
|-------------|--------------------------|----------------|---------|---------------------------|----------------|---------|
|             | Estimate                 | Standard Error | P value | Estimate                  | Standard Error | P value |
| (Intercept) | -4.9463                  | 0.0882         | < 2e-16 | -8.5006                   | 0.0403         | < 2e-16 |
| A → C       | -0.5390                  | 0.0425         | < 2e-16 | 0.2516                    | 0.0386         | 0.0000  |
| A → G       | -20.3654                 | 199.8785       | 0.9188  | 0.5605                    | 0.0327         | < 2e-16 |
| A → T       | -2.5739                  | 0.1941         | < 2e-16 | -1.8410                   | 0.0804         | < 2e-16 |
| C → A       | -0.3709                  | 0.0652         | 0.0000  | -0.5568                   | 0.0597         | < 2e-16 |
| C → G       | 0.2103                   | 0.0832         | 0.0115  | -0.7645                   | 0.0795         | < 2e-16 |
| C → T       | -18.8859                 | 160.8217       | 0.9065  | -0.1999                   | 0.0333         | 0.0000  |
| G → A       | -18.9098                 | 175.1755       | 0.9140  | -0.2965                   | 0.0334         | < 2e-16 |
| G → C       | -0.4230                  | 0.0867         | 0.0000  | -1.0371                   | 0.0765         | < 2e-16 |
| G → T       | -0.2191                  | 0.0843         | 0.0093  | -0.9073                   | 0.0766         | < 2e-16 |
| T → A       | -2.9141                  | 0.2342         | < 2e-16 | -1.9927                   | 0.0787         | < 2e-16 |
| T → C       | -21.4824                 | 350.3248       | 0.9511  | 0.6199                    | 0.0327         | < 2e-16 |
| up base A   | 0.2146                   | 0.0355         | 0.0000  | 0.1933                    | 0.0102         | < 2e-16 |
| up base C   | 0.1302                   | 0.0359         | 0.0003  | 0.4234                    | 0.0103         | < 2e-16 |
| up base G   | 0.2396                   | 0.0345         | 0.0000  | 0.5518                    | 0.0101         | < 2e-16 |
| down base A | -0.0373                  | 0.0357         | 0.2954  | -0.2143                   | 0.0102         | < 2e-16 |
| down base C | 0.0437                   | 0.0338         | 0.1959  | 0.3563                    | 0.0096         | < 2e-16 |
| down base G | -0.1327                  | 0.0341         | 0.0001  | 0.2369                    | 0.0096         | < 2e-16 |
| GC          | -0.0124                  | 0.0011         | < 2e-16 | 0.0069                    | 0.0003         | < 2e-16 |
| hmer_den    | -0.2782                  | 0.1289         | 0.0309  | -0.1402                   | 0.0371         | 0.0002  |
| hmer_op     | 0.0699                   | 0.0358         | 0.0506  | -0.1256                   | 0.0104         | < 2e-16 |
| hmer_dist   | 0.0051                   | 0.0038         | 0.1842  | 0.0003                    | 0.0011         | 0.7654  |
| hmer_len    | 0.0075                   | 0.0116         | 0.5139  | 0.0029                    | 0.0033         | 0.3820  |
| alt_up_down | 0.0171                   | 0.0247         | 0.4879  | 0.0825                    | 0.0070         | < 2e-16 |
