# Supplementary material for: Statistical modeling for sensitive detection of low-frequency single nucleotide variants
Source: PubMed Central journal article supplement (PMC5001245; doi:10.1186/s12864-016-2905-x), 2016-08-22

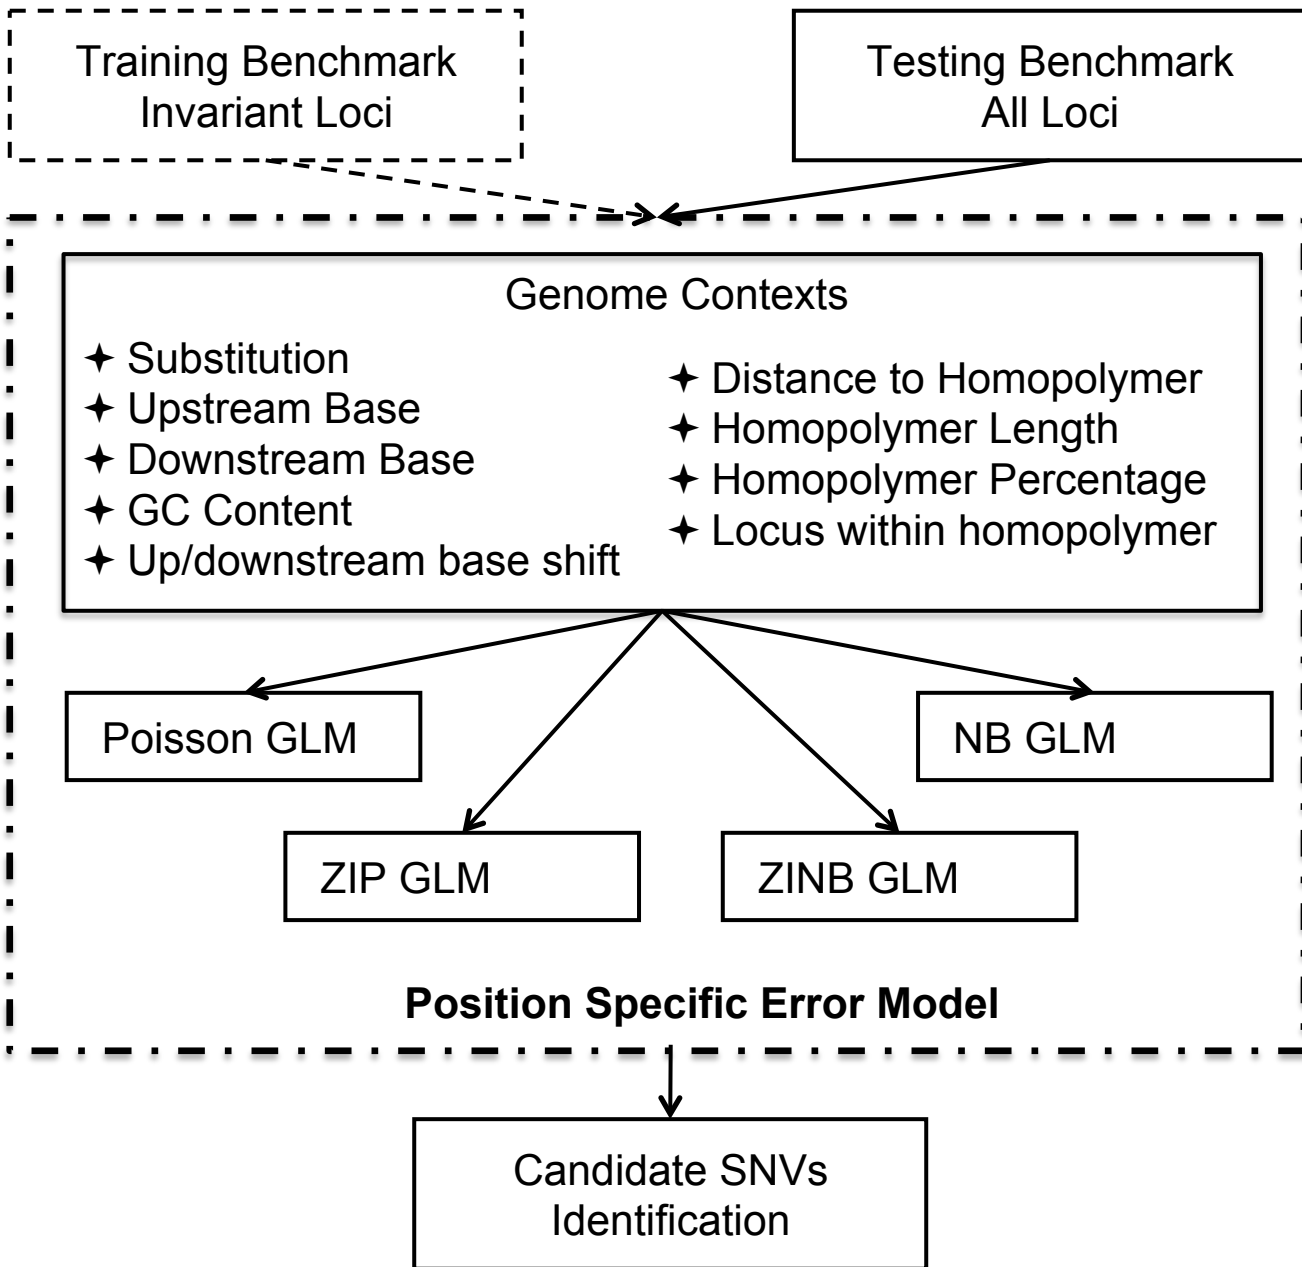

Supplement: 12864_2016_2905_MOESM11_ESM.pdf [file 12864_2016_2905_MOESM11_ESM.pdf]
